# Supplementary material for: PLGA/BK microspheres targeting the bradykinin signaling pathway as a therapeutic strategy to delay intervertebral disc degeneration
Source: PubMed Central journal article supplement — Commun Biol. 2024 Nov 20;7:1540. doi: 10.1038/s42003-024-07196-0 (PMC11579381; doi:10.1038/s42003-024-07196-0), 2024-11-20
Supplement: 42003_2024_7196_MOESM1_ESM.pdf [file 42003_2024_7196_MOESM1_ESM.pdf]

# **PLGA/BK Microspheres as a Therapeutic Strategy for Delaying Intervertebral Disc Degeneration**

Xiaoming Qiu<sup>#1,2,3</sup>, Yizhi Zhang<sup>#1,3</sup>, Ziyang Wei<sup>#1,3</sup>, Zhangbin Luo<sup>1,3</sup>, Zhuanping Wang<sup>1,3,4</sup>, Xuewen Kang<sup>\*1,3</sup>

1. Lanzhou University Second Hospital, Lanzhou, Gansu 730030, PR China
2. The First Affiliated Hospital of Gansu University of Traditional Chinese Medicine, Gansu provincial hospital of TCM, Lanzhou, Gansu 730030, PR China
3. Orthopaedics Key Laboratory of Gansu Province, Lanzhou, Gansu 730030, PR China
4. Department of Endocrinology, Lanzhou University Second Hospital, Lanzhou, Gansu 730030, PR China

\* Corresponding author.

E-mail addresses: ery\_kangxw@lzu.edu.cn (Xuewen Kang)

# Xiaoming Qiu, #Yizhi Zhang and #Ziyang Wei contributed equally to this work.

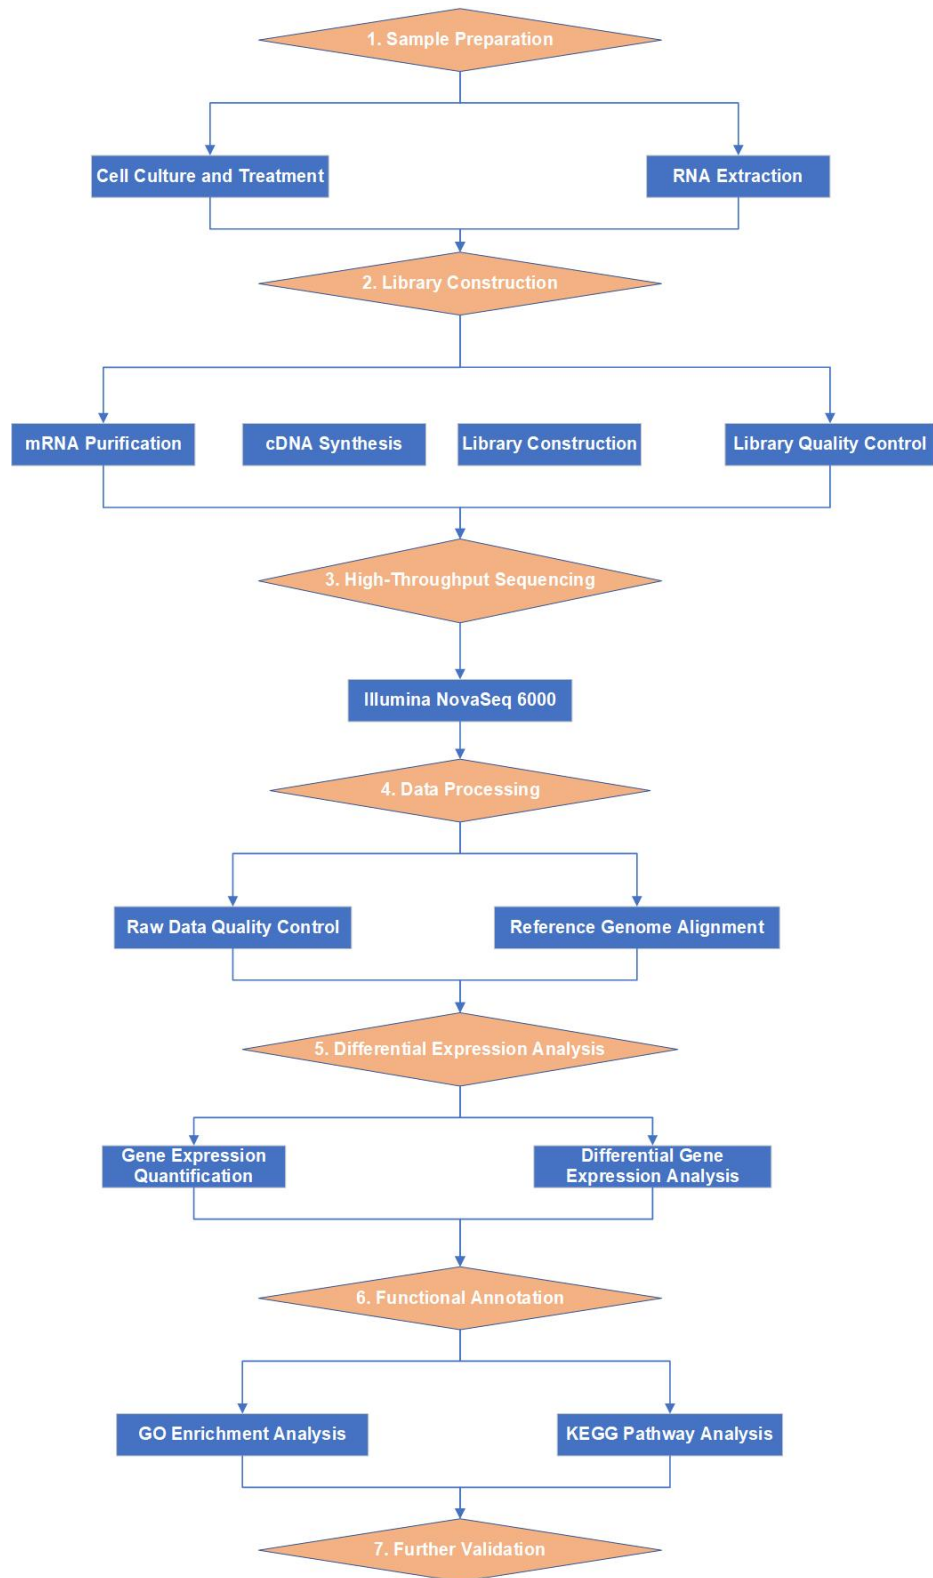

Figure S1: Bulk RNA-seq Workflow for BK-Intervened NPCs

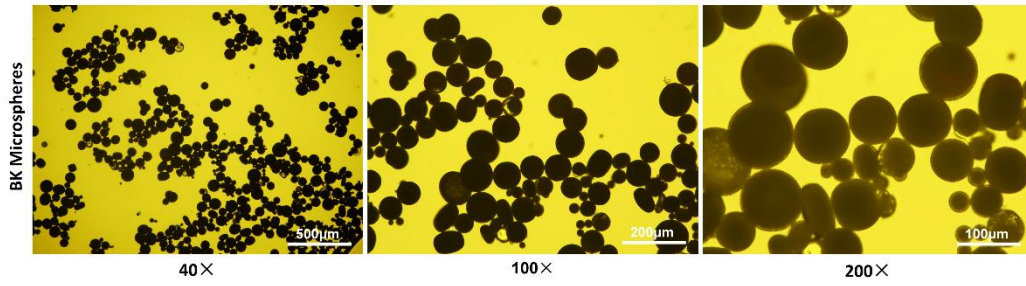

Figure S2: Microsphere morphology under optical microscope

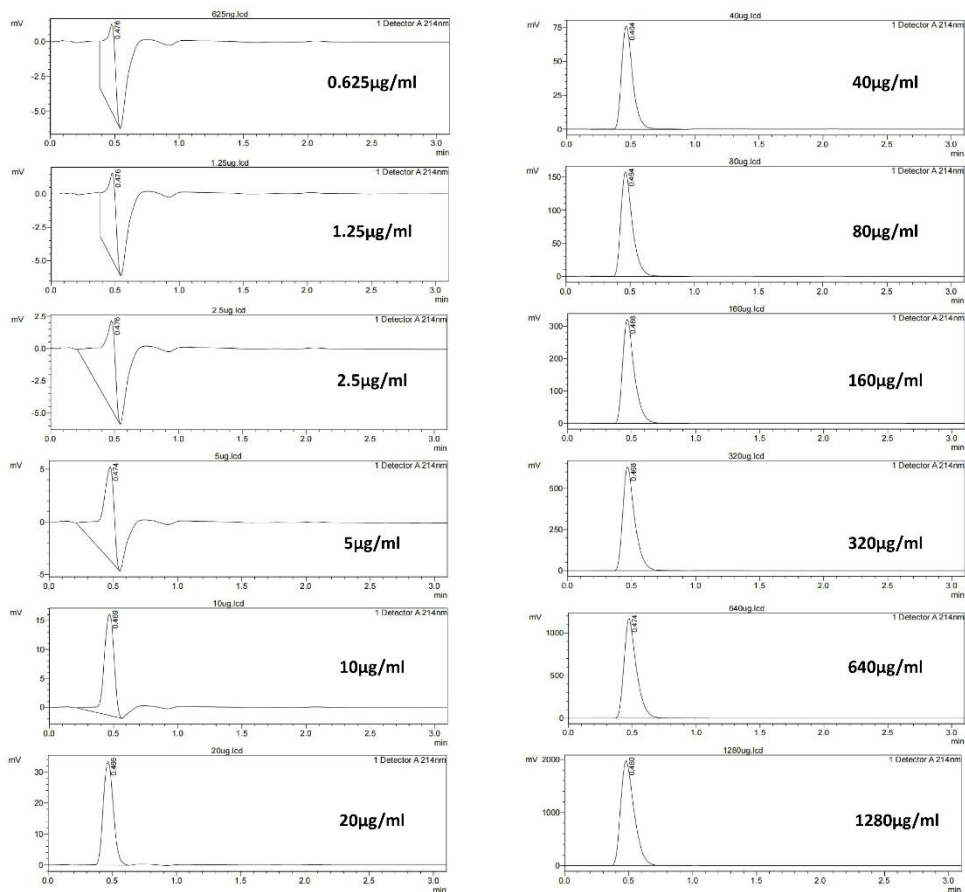

Figure S3: HPLC analysis at the wavelength of 214 nm

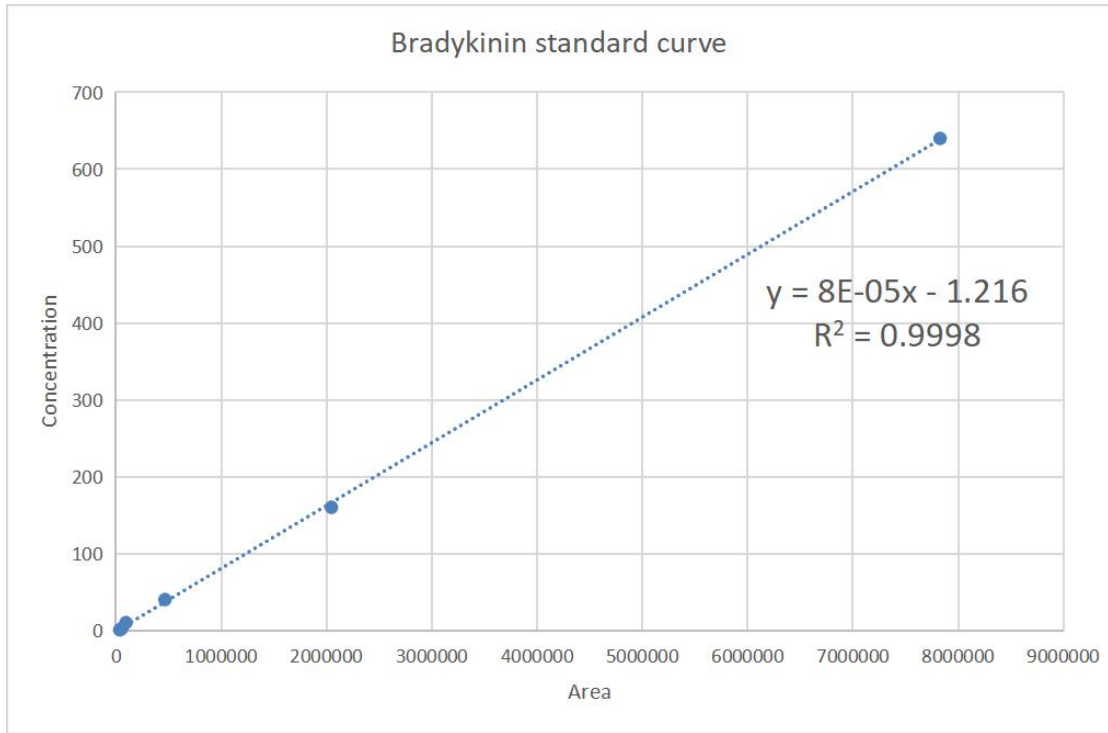

Figure S4: Standard curve of BK

FIG 1

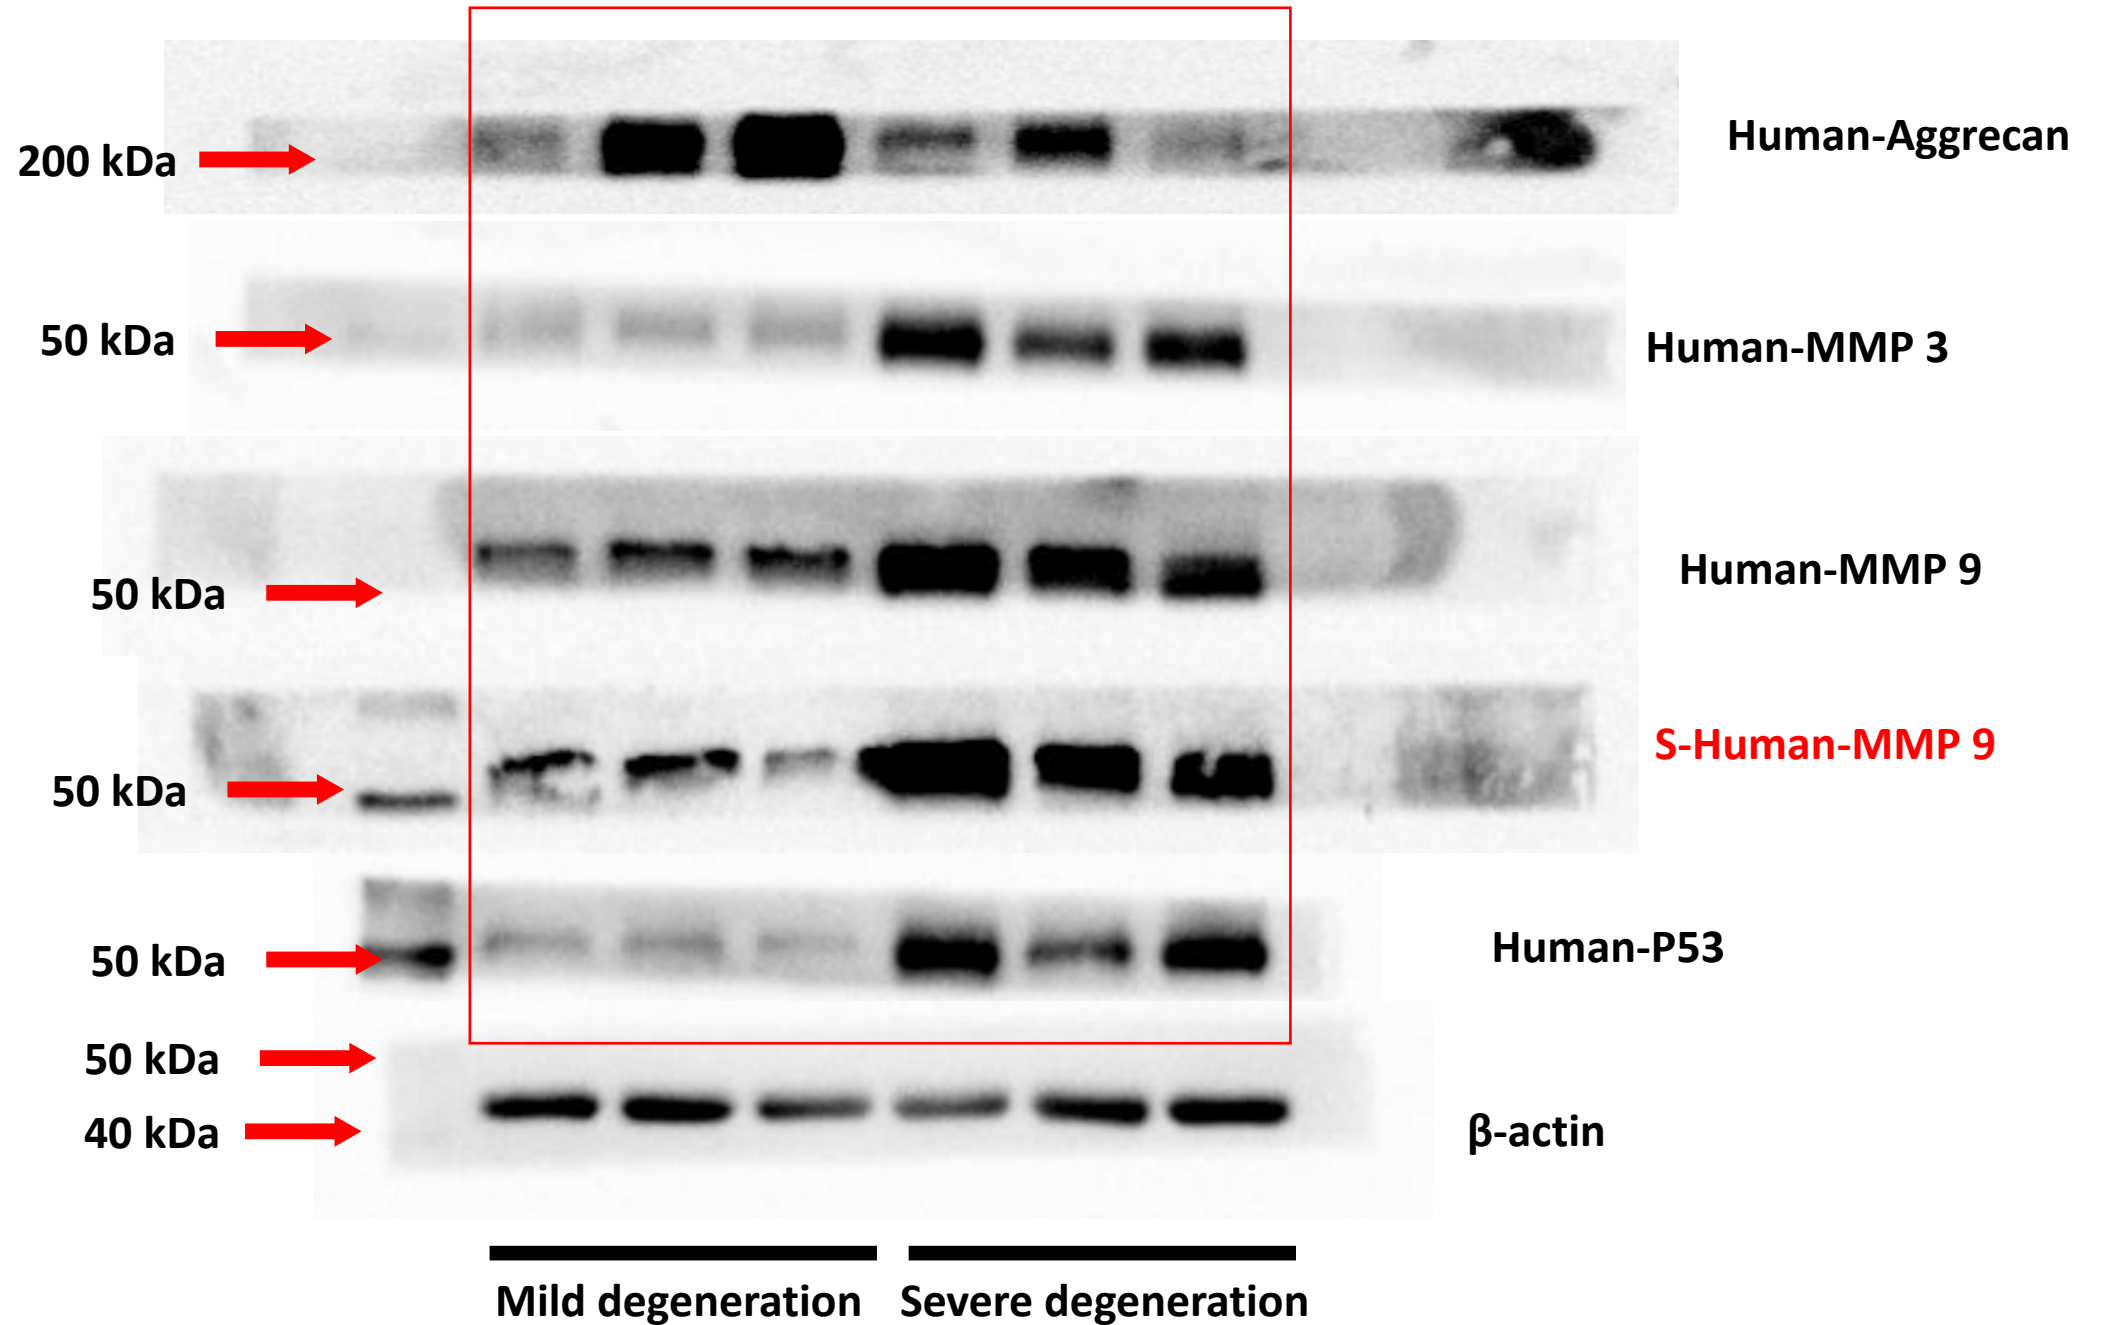

FIG 3C

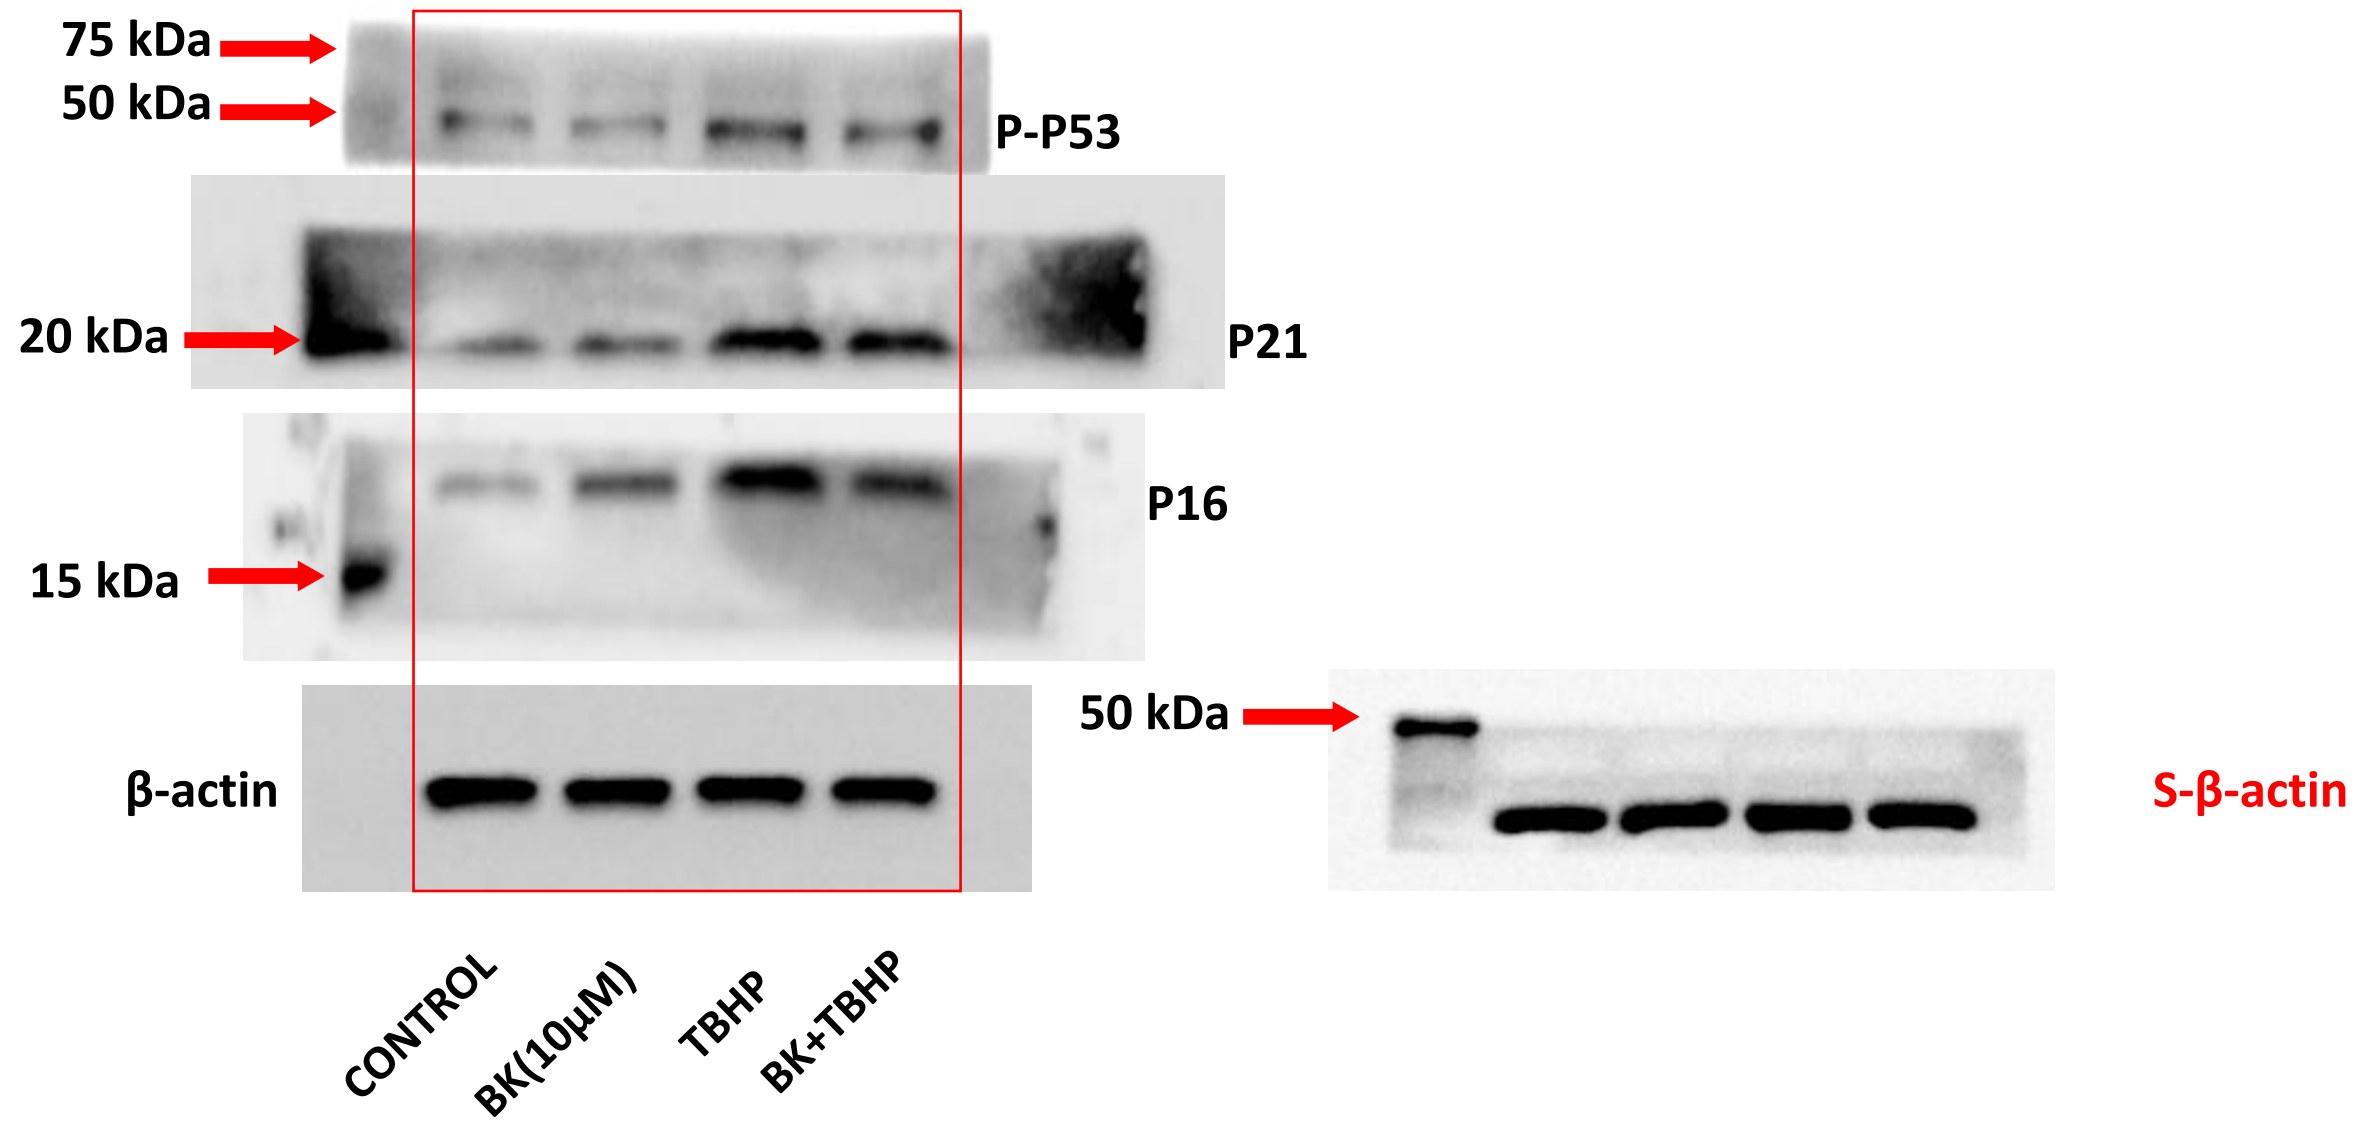

FIG 3I

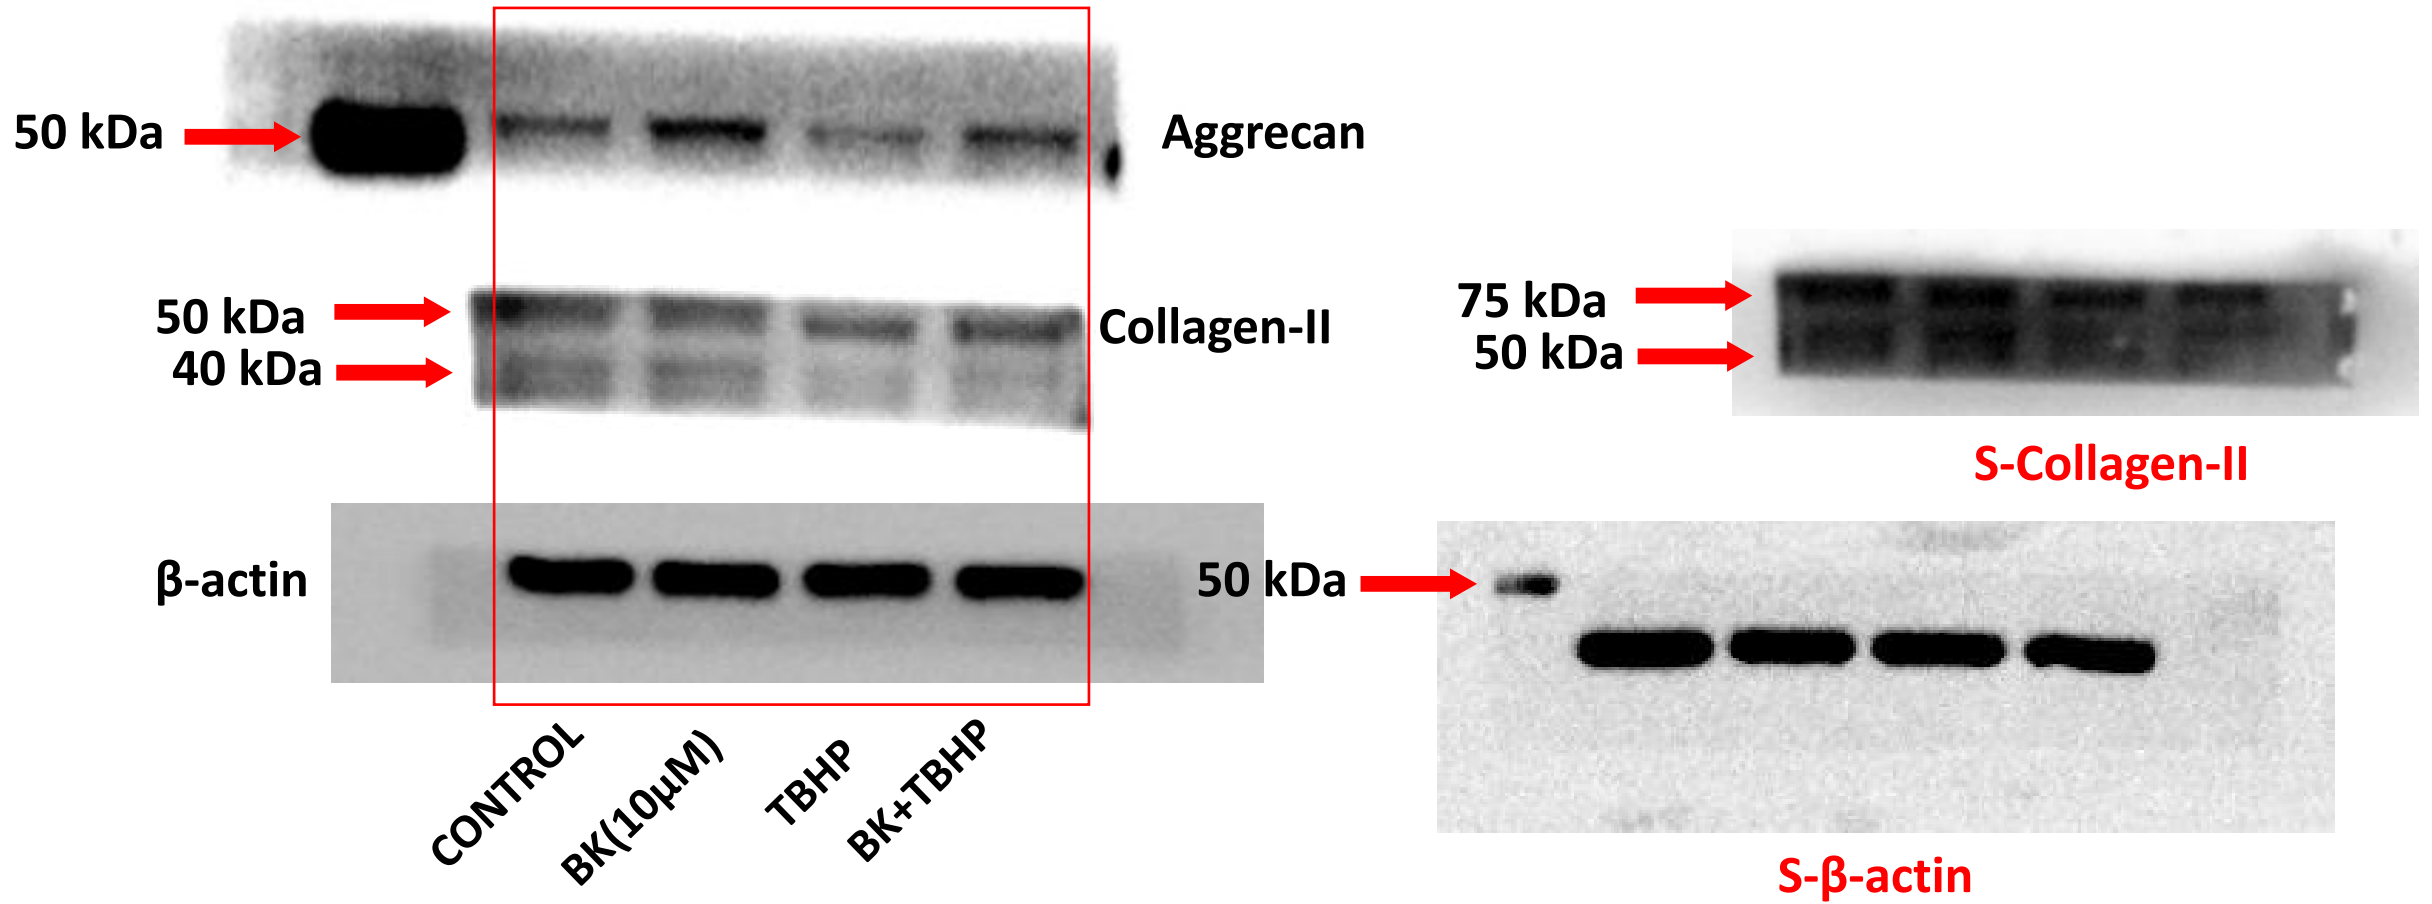

FIG 3N

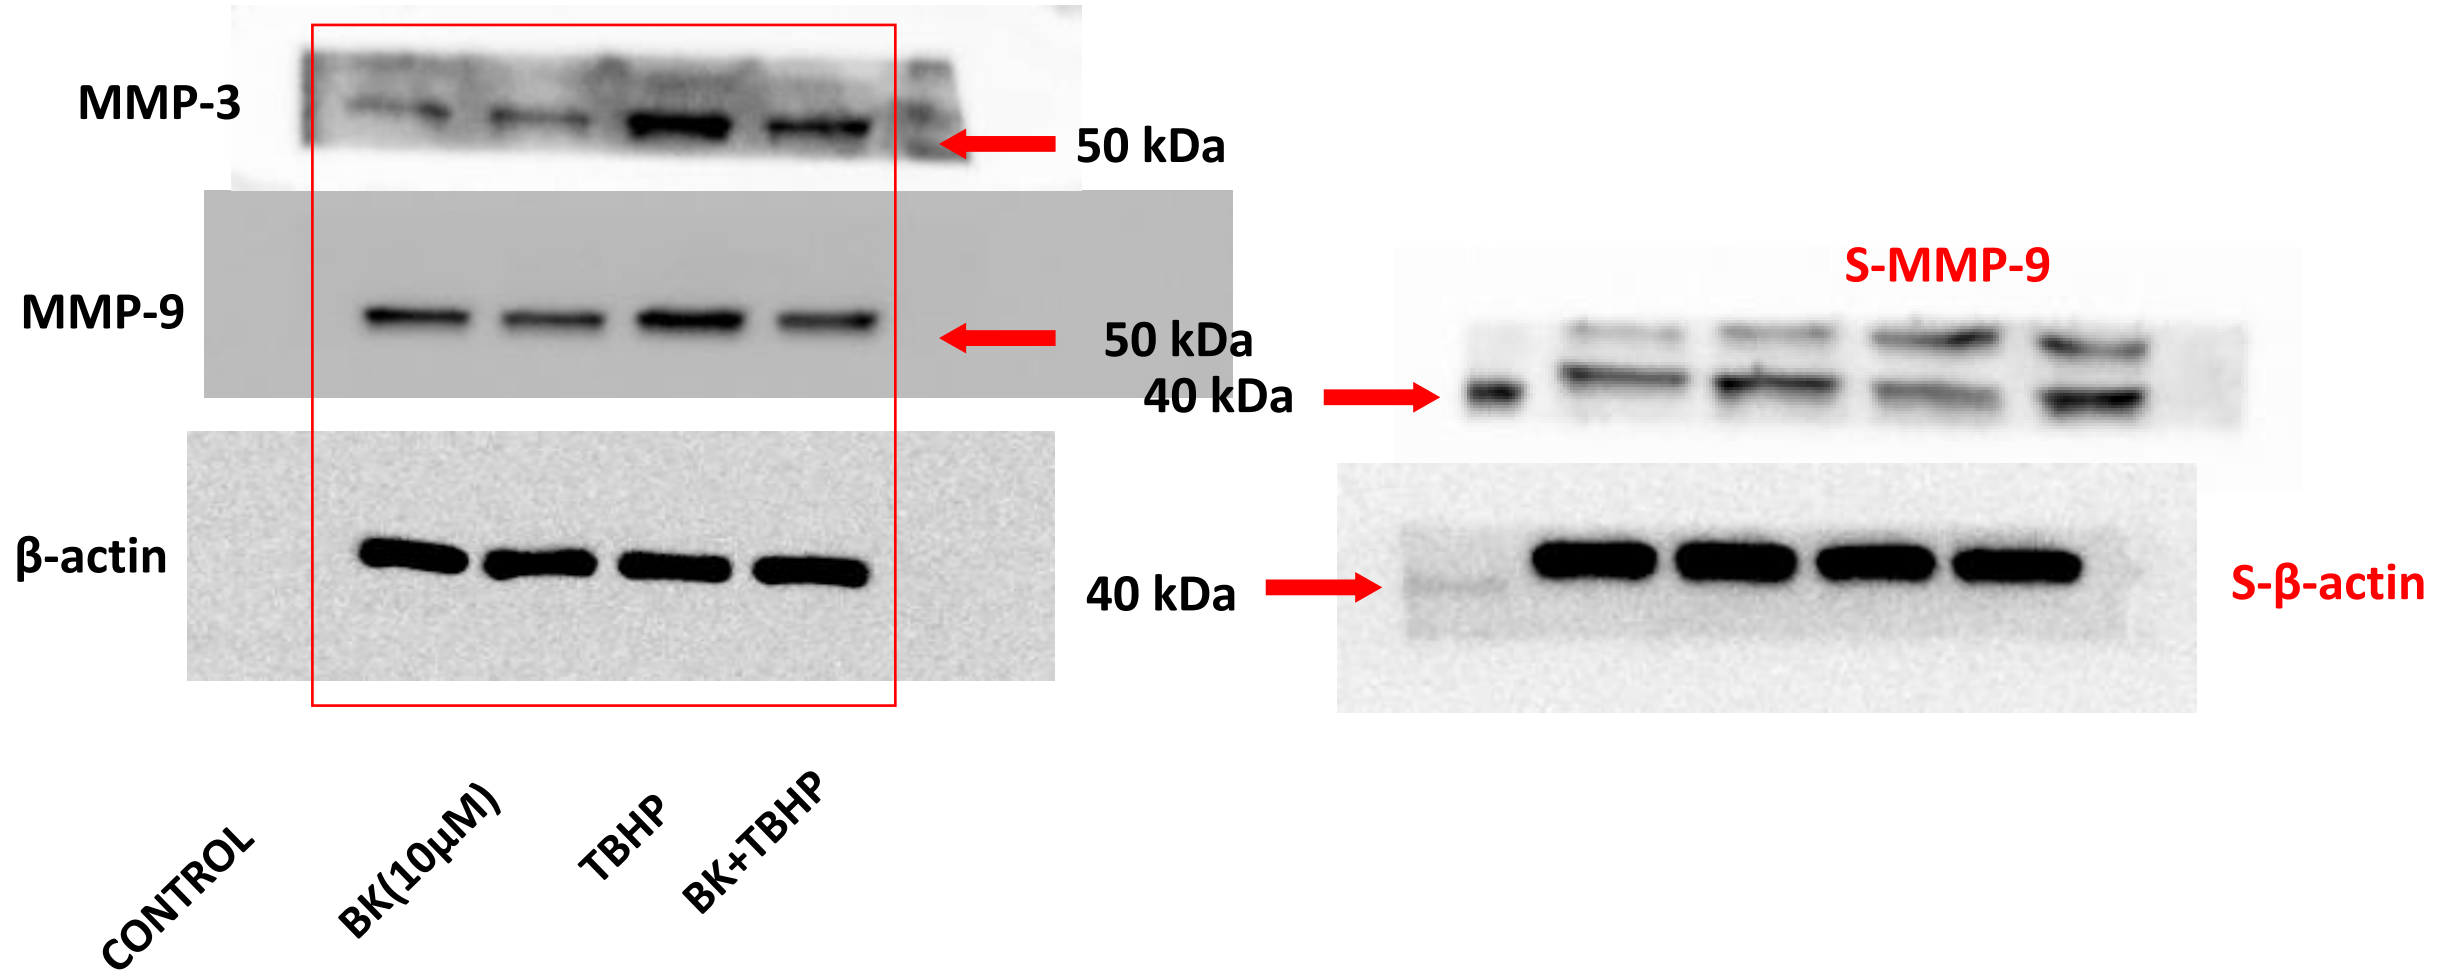



FIG 3Q

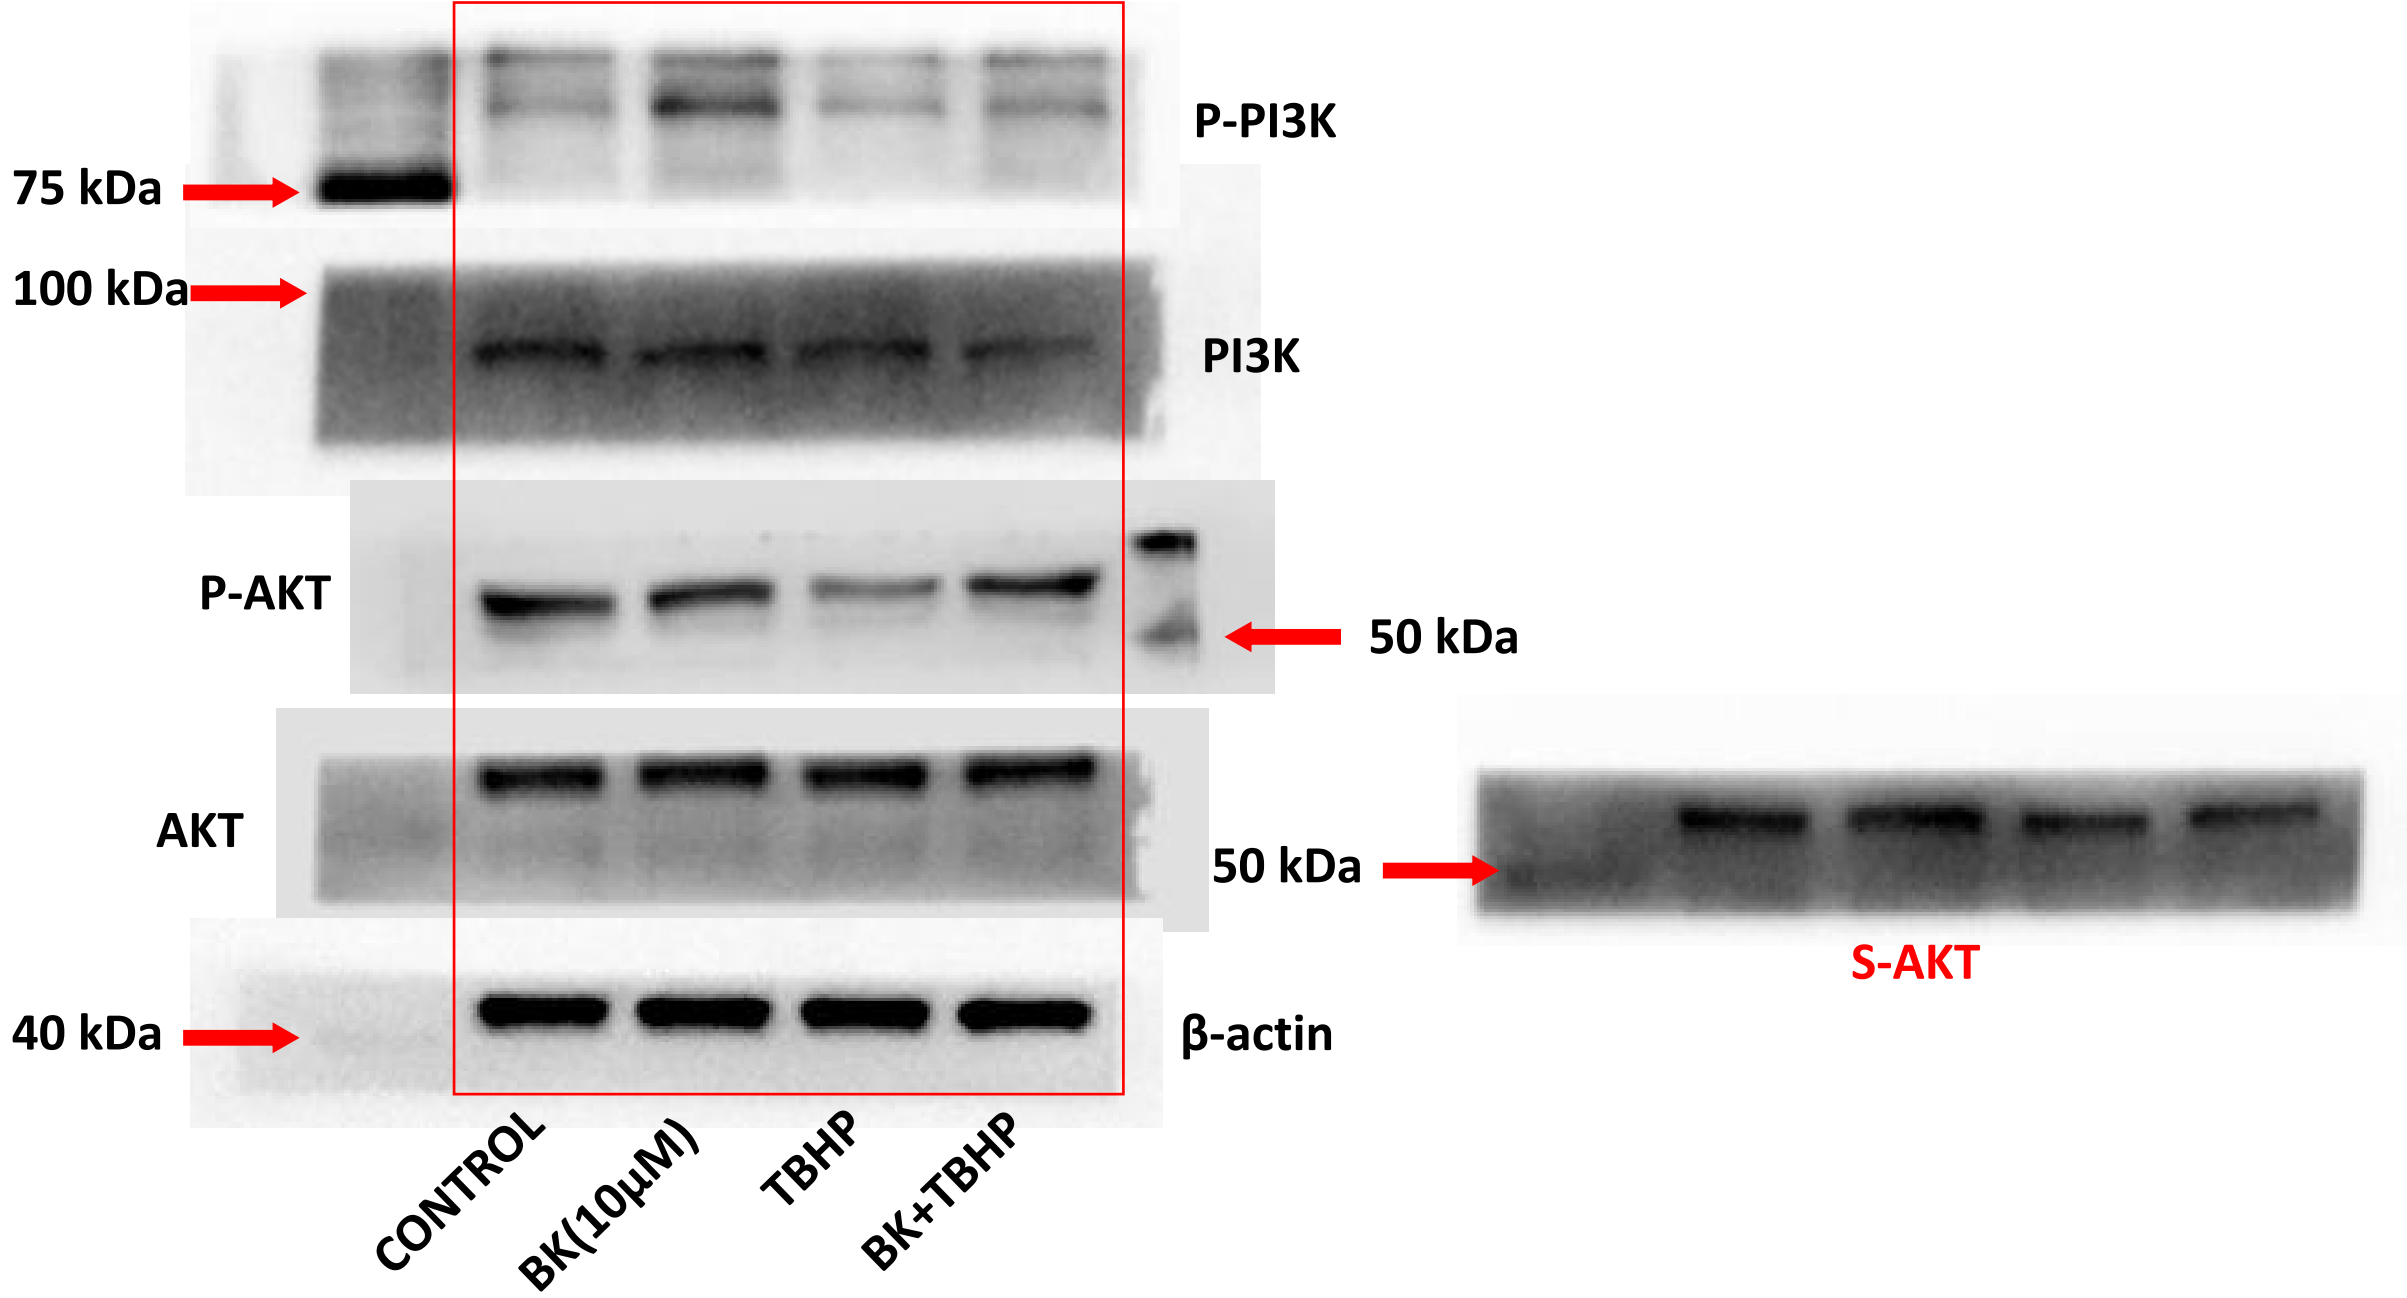

FIG 4C

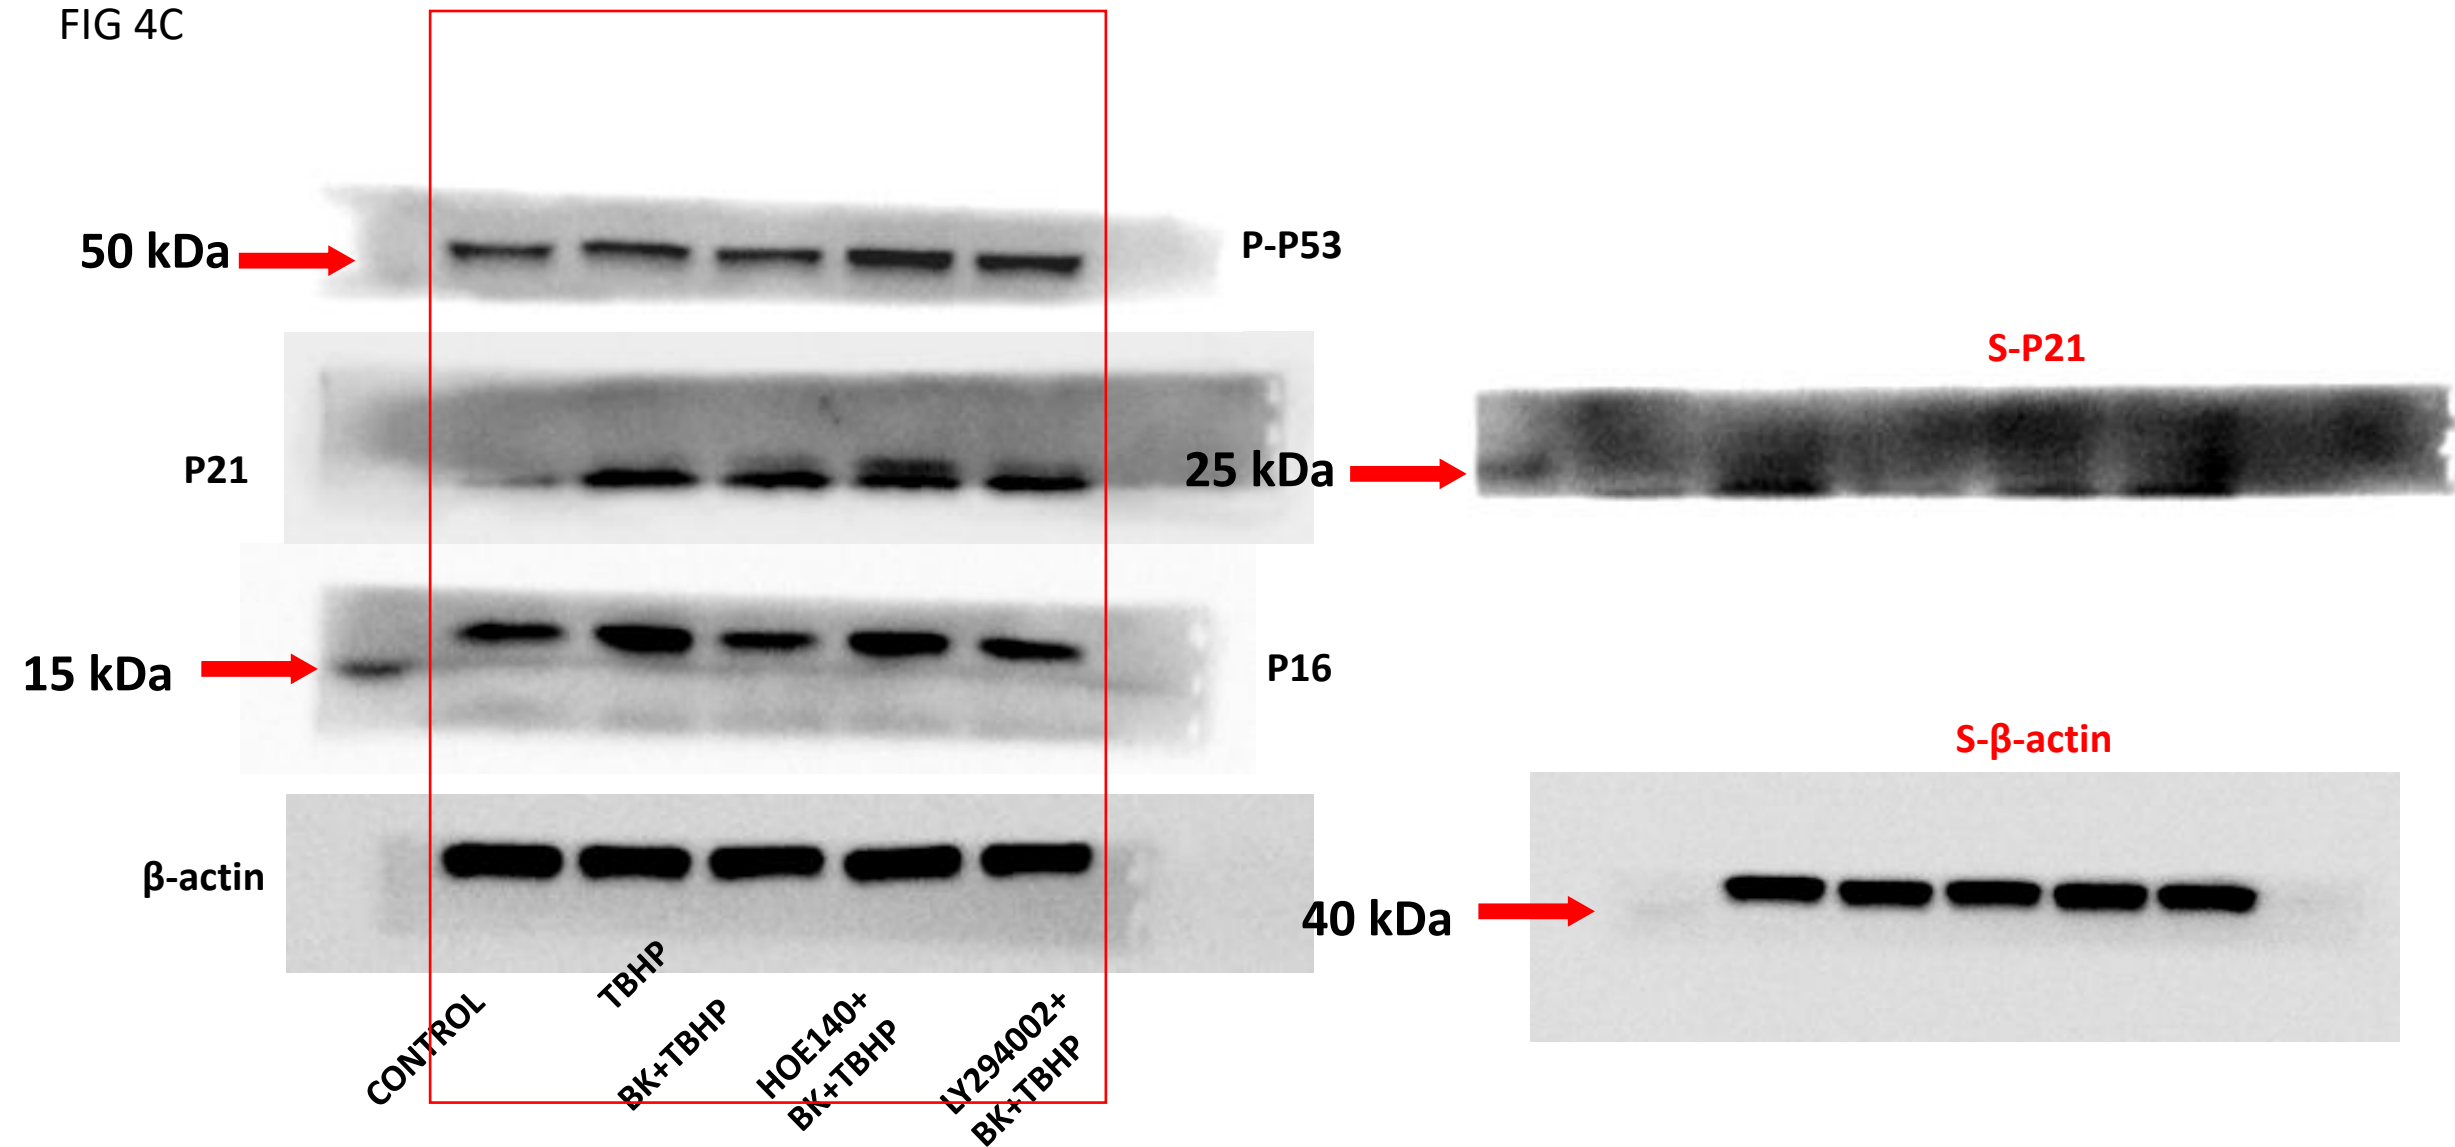

FIG 4I

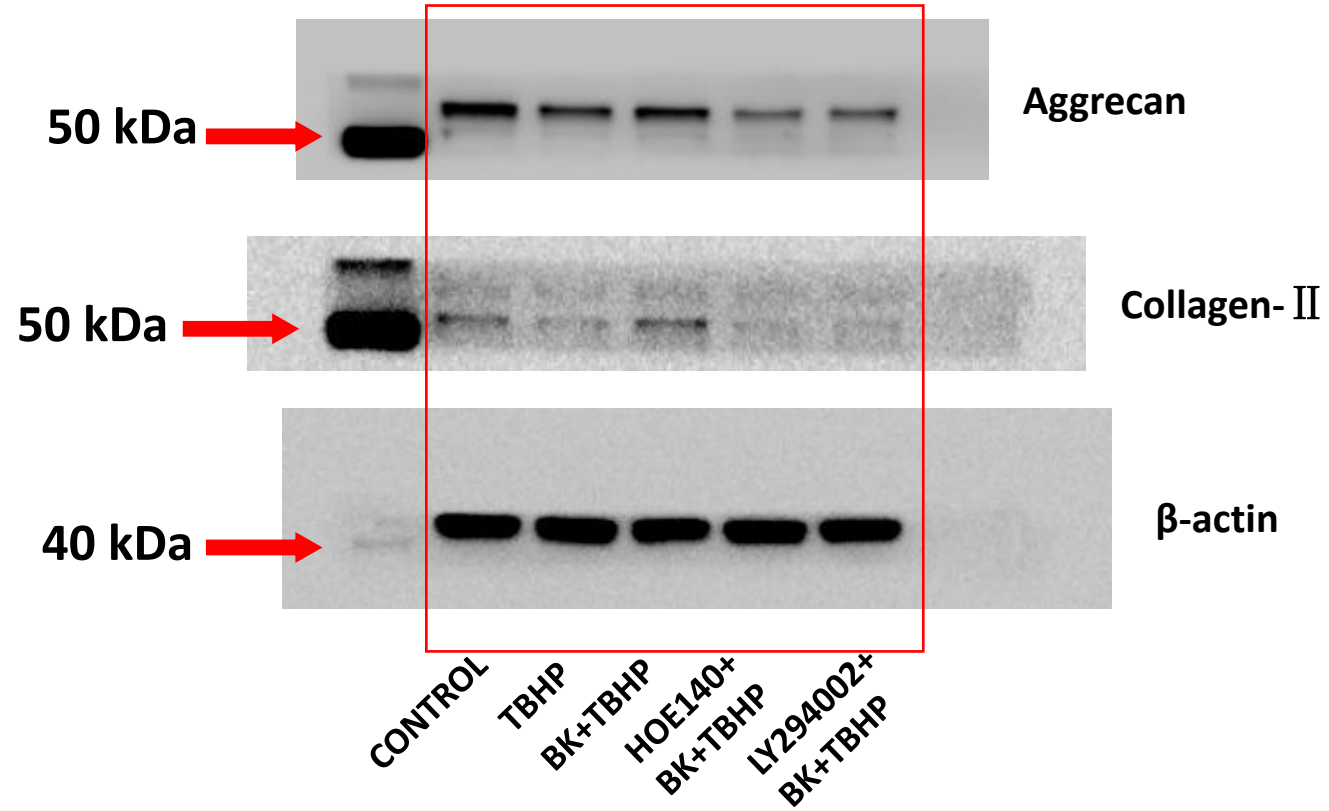

FIG 4N

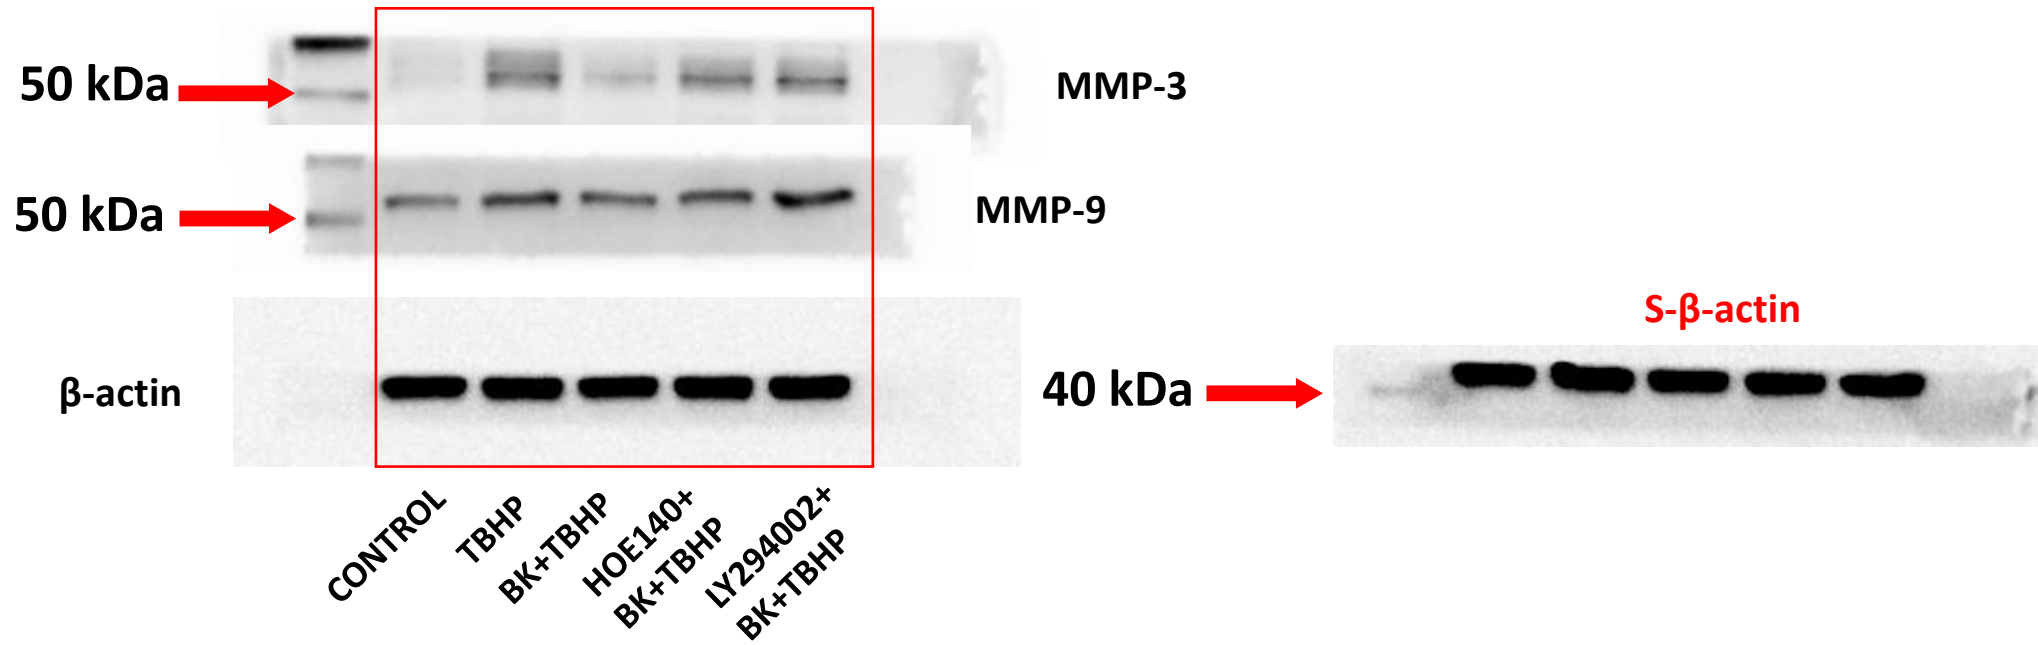

FIG 4Q

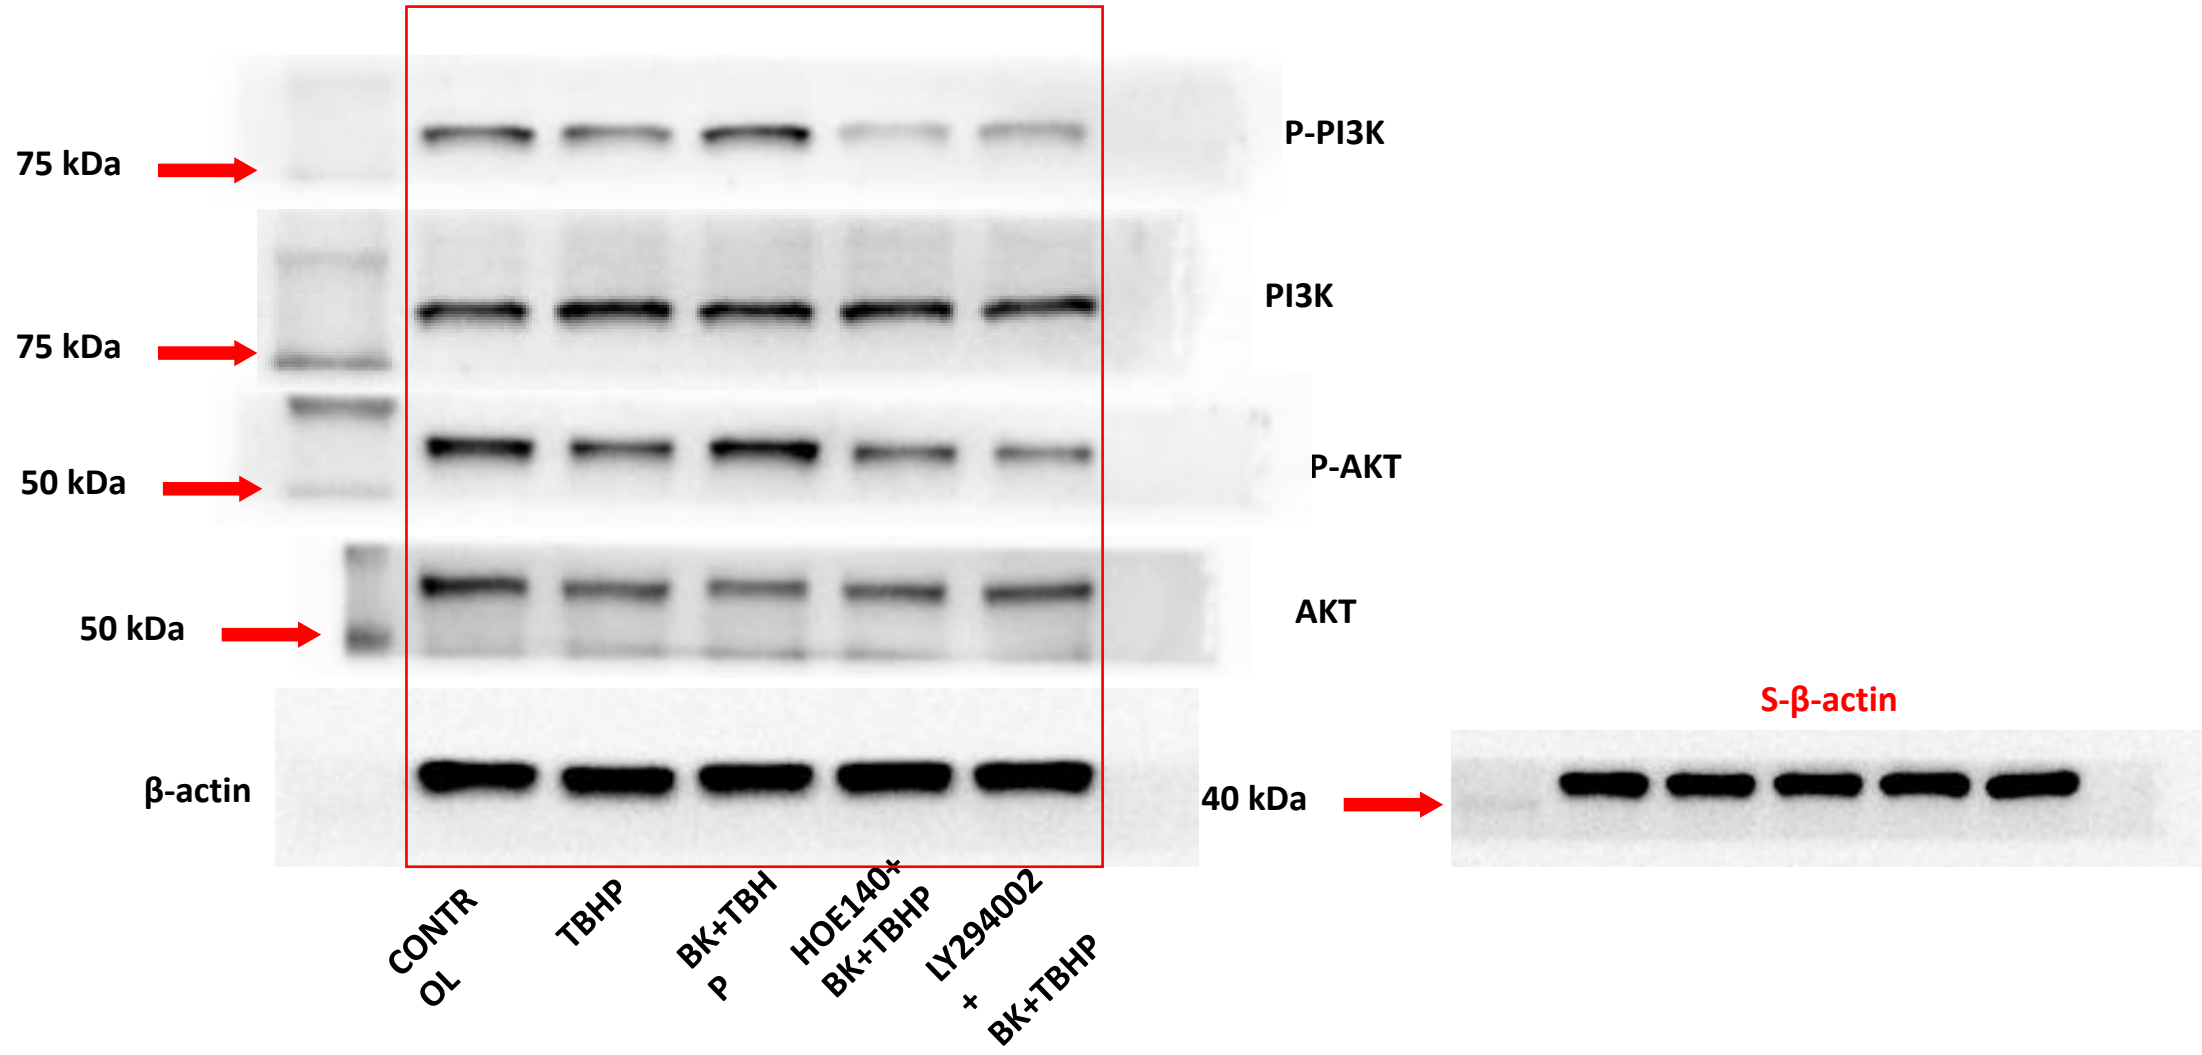

Figure S5: Uncropped and Unedited Western Blot/Gel Images Supporting Quantitative Analyses

Table S1 Orthogonal factor level table

| Level | Factor |        |       |           |
|-------|--------|--------|-------|-----------|
|       | A (mg) | B (mg) | C (%) | D (r/min) |
| 1     | 200    | 1      | 0.5   | 400       |
| 2     | 100    | 0.5    | 1     | 800       |
| 3     | 50     | 0.25   | 1.5   | 1200      |

Table S2 Orthogonal experimental design table

| Test number | Factor |   |   |   | Result |
|-------------|--------|---|---|---|--------|
|             | A      | B | C | D | S      |
| 1           | 1      | 1 | 1 | 1 |        |
| 2           | 1      | 2 | 2 | 2 |        |
| 3           | 1      | 3 | 3 | 3 |        |
| 4           | 2      | 1 | 2 | 3 |        |
| 5           | 2      | 2 | 3 | 1 |        |
| 6           | 2      | 3 | 1 | 2 |        |
| 7           | 3      | 1 | 3 | 2 |        |
| 8           | 3      | 2 | 1 | 3 |        |
| 9           | 3      | 3 | 2 | 1 |        |

Table S3 Postoperative observation items

|                          | X-ray | MR | Histopathology | IHC |
|--------------------------|-------|----|----------------|-----|
| On the day after surgery | √     | √  | √              |     |
| One month after surgery  | √     | √  | √              |     |

---

Two month after surgery   √       √       √                   √

---

**Table S4 Orthogonal table of PLGA/BK microsphere preparation**

| Number | Factor |        |        |        | Result            |
|--------|--------|--------|--------|--------|-------------------|
|        | A      | B      | C      | D      | S <sub>1</sub> /% |
| 1      | 1      | 1      | 1      | 1      | 23.97             |
| 2      | 1      | 2      | 2      | 2      | 14.17             |
| 3      | 1      | 3      | 3      | 3      | 45.90             |
| 4      | 2      | 1      | 2      | 3      | 36.74             |
| 5      | 2      | 2      | 3      | 1      | 62.57             |
| 6      | 2      | 3      | 1      | 2      | 21.86             |
| 7      | 3      | 1      | 3      | 2      | 20.89             |
| 8      | 3      | 2      | 1      | 3      | 5.02              |
| 9      | 3      | 3      | 2      | 1      | 7.31              |
| K1     | 28.01  | 27.003 | 16.950 | 31.283 |                   |
| K2     | 40.39  | 27.253 | 19.407 | 18.973 |                   |
| K3     | 11.07  | 25.023 | 43.120 | 29.220 |                   |
| R      | 29.31  | 2.230  | 26.170 | 12.310 |                   |

---

A) oil phase (mass of PLGA added to dichloromethane, 4.5 ml); B) inner water phase (mass of BK in aqueous solution, 0.5 ml); C) outer aqueous phase (PVA solution concentration, 40 ml); and D) stirring speed.

**Table S5 Orthogonal table of PLGA/BK microsphere preparation**

| Number | Factor |       |       |       | Result            |
|--------|--------|-------|-------|-------|-------------------|
|        | A      | B     | C     | D     | S <sub>2</sub> /% |
| 1      | 1      | 1     | 1     | 1     | 0.120             |
| 2      | 1      | 2     | 2     | 2     | 0.035             |
| 3      | 1      | 3     | 3     | 3     | 0.057             |
| 4      | 2      | 1     | 2     | 3     | 0.367             |
| 5      | 2      | 2     | 3     | 1     | 0.313             |
| 6      | 2      | 3     | 1     | 2     | 0.055             |
| 7      | 3      | 1     | 3     | 2     | 0.418             |
| 8      | 3      | 2     | 1     | 3     | 0.050             |
| 9      | 3      | 3     | 2     | 1     | 0.037             |
| K1     | 0.071  | 0.302 | 0.075 | 0.157 |                   |
| K2     | 0.245  | 0.133 | 0.146 | 0.169 |                   |
| K3     | 0.168  | 0.050 | 0.263 | 0.158 |                   |
| R      | 0.174  | 0.252 | 0.188 | 0.012 |                   |

A) oil phase (mass of PLGA added to dichloromethane, 4.5 ml); B) inner water phase (mass of BK in aqueous solution, 0.5 ml); C) outer aqueous phase (PVA solution concentration, 40 ml); and D) stirring speed.



Table S6 Table of parallel experiments on the effect of different weights of PLGA on microsphere size, drug loading rate, and encapsulation efficiency

| A (mg) | B (mg) | C (%) | D (r/min) | Encapsulation efficiency (%) | Drug loading rate (%) | Particle size ( $\mu\text{m}$ ) |
|--------|--------|-------|-----------|------------------------------|-----------------------|---------------------------------|
| 200    | 0.5    | 1.5   | 400       | 15.43 $\pm$ 1.29             | 0.039 $\pm$ 0.003     | 95.06 $\pm$ 1.49                |
| 100    | 0.5    | 1.5   | 400       | 74.10 $\pm$ 9.17             | 0.370 $\pm$ 0.046     | 87.44 $\pm$ 0.05                |
| 50     | 0.5    | 1.5   | 400       | 5.08 $\pm$ 0.07              | 0.051 $\pm$ 0.001     | 60.33 $\pm$ 0.29                |

A) oil phase (mass of PLGA added to dichloromethane, 4.5 ml); B) inner water phase (mass of BK in aqueous solution, 0.5 ml); C) outer aqueous phase (PVA solution concentration, 40 ml); and D) stirring speed.
