# Supplementary material for: PLGA/BK microspheres targeting the bradykinin signaling pathway as a therapeutic strategy to delay intervertebral disc degeneration
Source: PubMed Central journal article supplement — Commun Biol. 2024 Nov 20;7:1540. doi: 10.1038/s42003-024-07196-0 (PMC11579381; doi:10.1038/s42003-024-07196-0), 2024-11-20
Supplement: 42003_2024_7196_MOESM2_ESM.pdf [file 42003_2024_7196_MOESM2_ESM.pdf]

## Description of Additional Supplementary Files

**File name:** Supplementary Data 1

**Description:** numerical source data for all graphs and charts presented in the main figures
